# Supplementary material for: Biopolymeric hydrogel electrolytes obtained by using natural polysaccharide–poly(itaconic acid-co-2-hydroxyethyl methacrylate) in deep eutectic solvents for rechargeable Zn–air batteries
Source: Royal Society of Chemistry journal article supplement (doi:10.1039/d3gc01952g), 2023-01-01
Supplement: d3gc01952g1.pdf [file d3gc01952g1.pdf]

## Supplementary Information

# **Biopolymeric hydrogel electrolytes obtained by natural polysaccharide-poly(itaconic acid-co-2hydroxyethyl methacrylate) in deep eutectic solvents for rechargeable Zn-air batteries**

ME Trejo-Caballero,<sup>a</sup> Lucía Díaz-Patiño,<sup>b</sup> Marlen González Reyna,<sup>b</sup> Gustavo A. Molina,<sup>a,d</sup> JL López-Miranda,<sup>b</sup> Rodrigo Esparza,<sup>b</sup> Beatriz Liliana España-Sánchez,<sup>c</sup> Noé Arjona,<sup>c\*</sup> and Miriam Estevez<sup>\*</sup>

*a. Posgrado en Ciencia e Ingeniería de Materiales, Centro de Física Aplicada y Tecnología Avanzada, Universidad Nacional Autónoma de México, Boulevard Juriquilla 3001, Querétaro 76230, Mexico*

*b. Centro de Investigación y Desarrollo Tecnológico en Electroquímica S. C., Sanfandila, Pedro Escobedo, Querétaro 76703, México*

*c. Centro de Física Aplicada y Tecnología Avanzada, Universidad Nacional Autónoma de México, Boulevard Juriquilla 3001, Querétaro 76230, Mexico*

*\* Corresponding authors: M. Estévez ([miries@fata.unam.mx](mailto:miries@fata.unam.mx)) and N. Arjona ([wvelazquez@cideteq.mx](mailto:wvelazquez@cideteq.mx))*



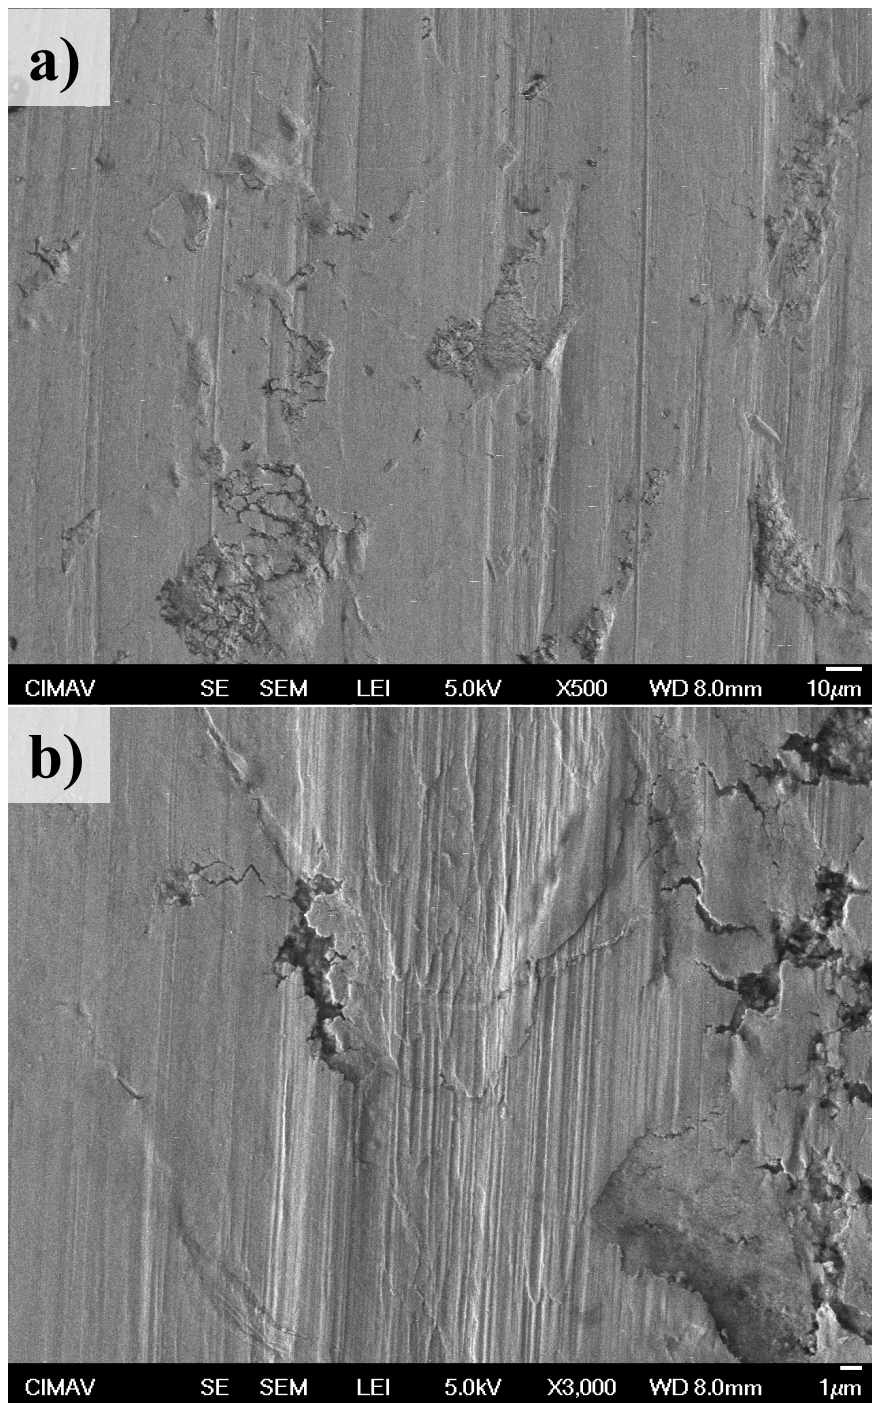

Fig. S2. SEM images of pure Zn foil before its use in the Zinc-air battery.

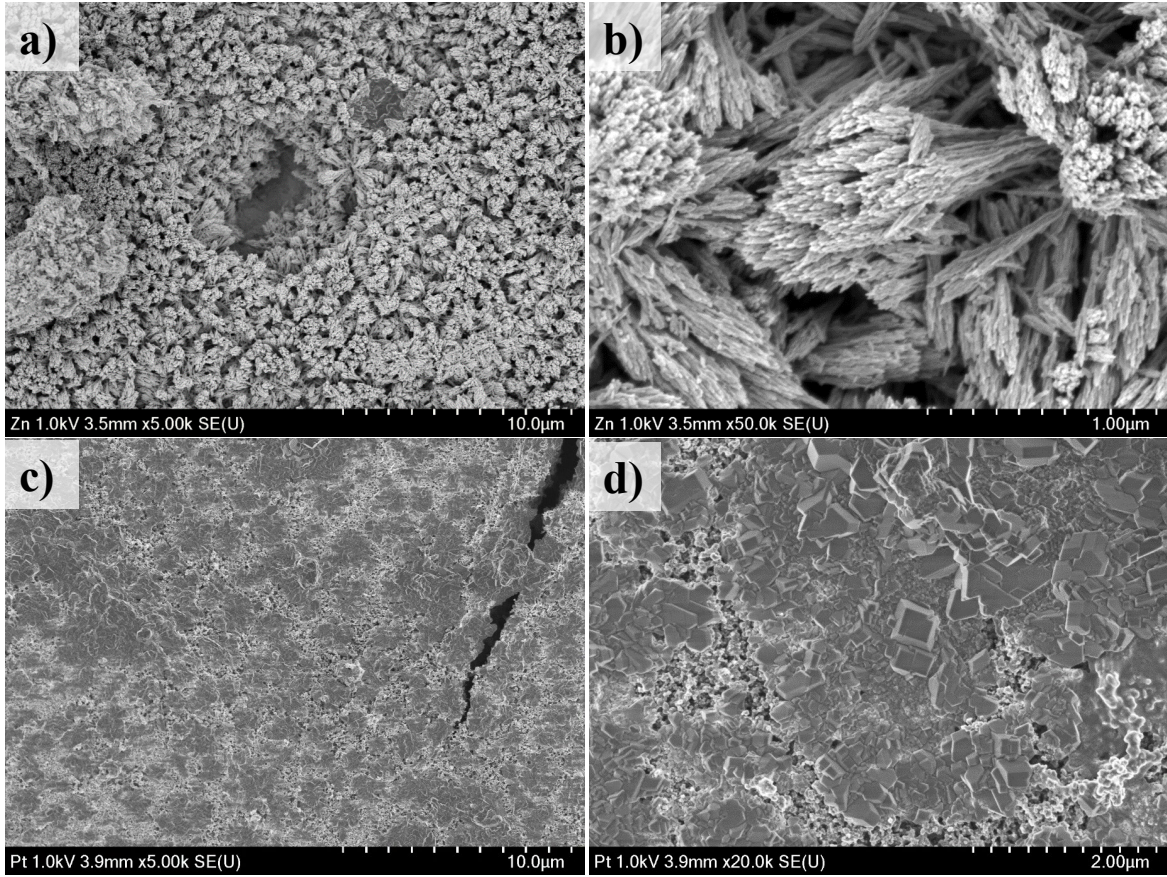

**Fig. S3.** SEM micrographs at different magnifications of (a, b) Zn anode, and (c, d) Pt electrode for the *post-mortem* analysis of the ZAB discharged at  $6.6 \text{ mA cm}^{-2}$  during 5 h.

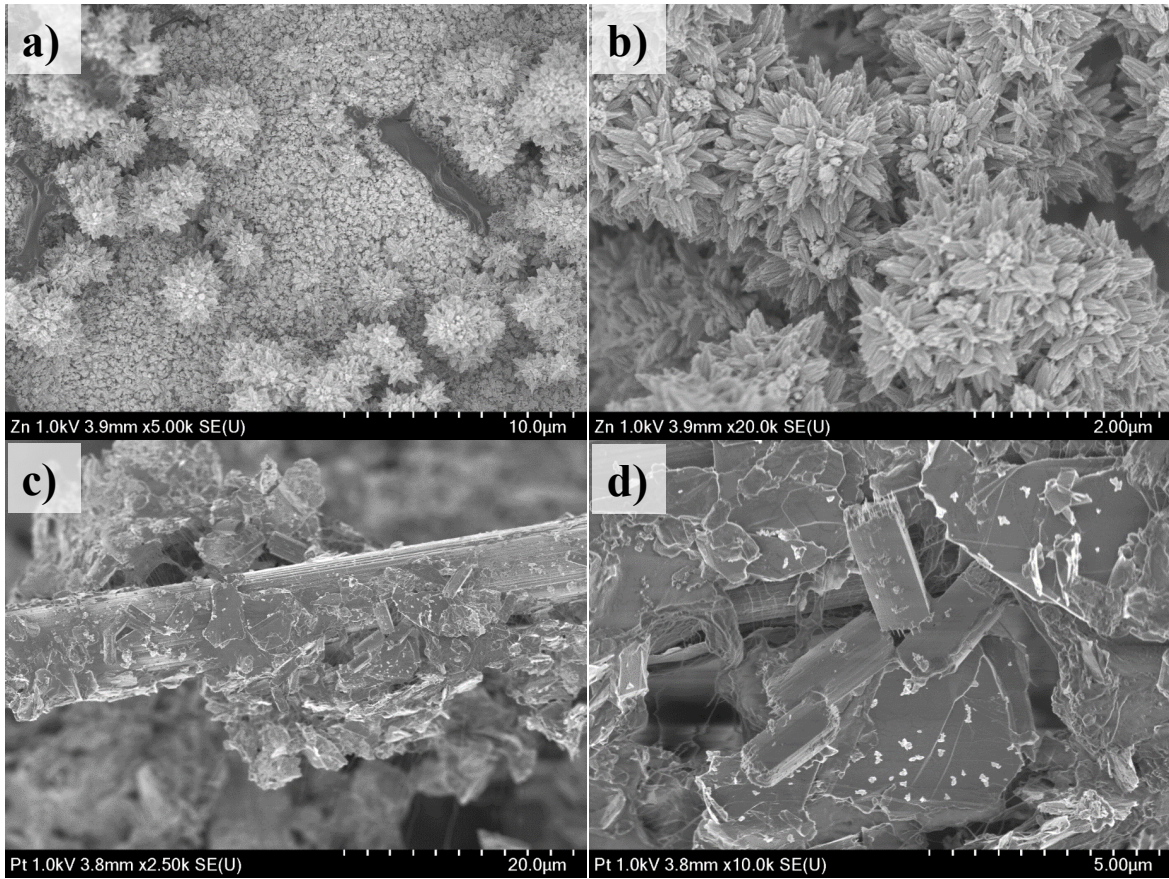

**Fig. S4.** SEM micrographs at different magnifications of (a, b) Zn anode, and (c, d) Pt electrode for the *post-mortem* analysis of the ZAB discharged at  $13 \text{ mA cm}^{-2}$  during 5 h.

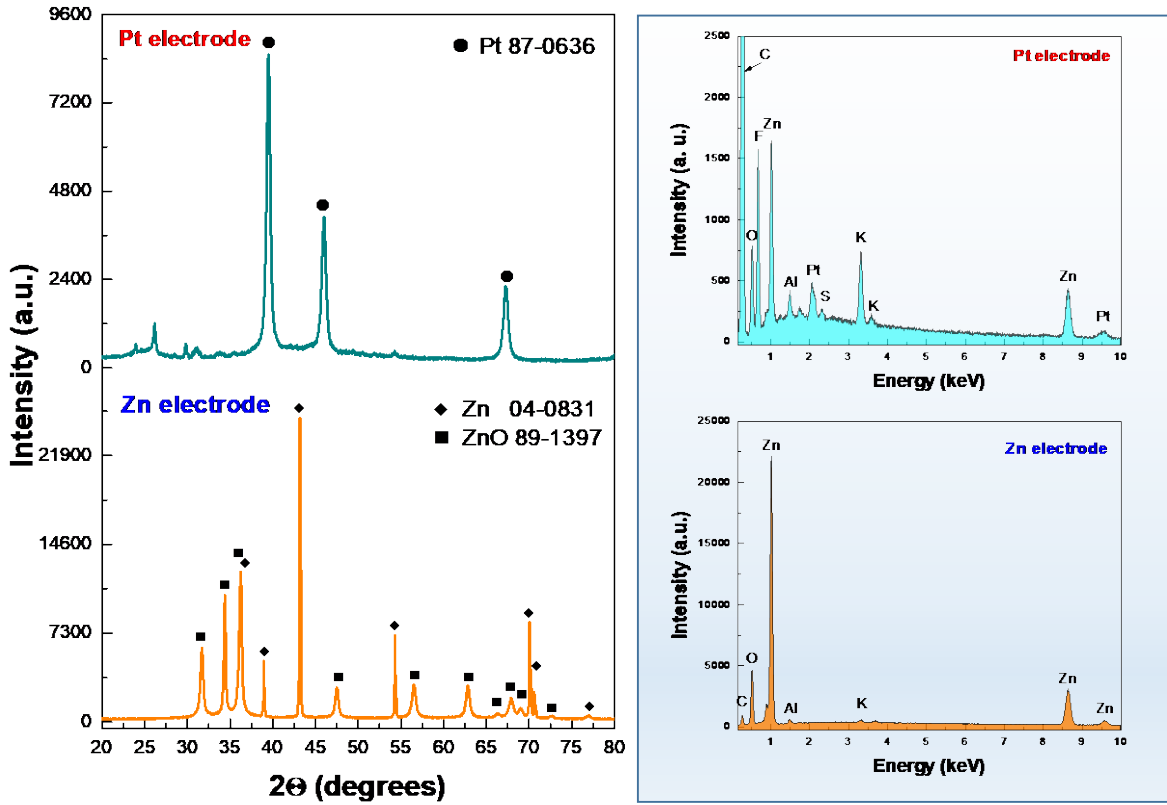

Fig. S5. a) X-ray diffraction patterns of Pt and Zn electrodes, and b) EDS analyzes after discharging the ZAB at  $13 \text{ mA cm}^{-2}$  during 5 h.

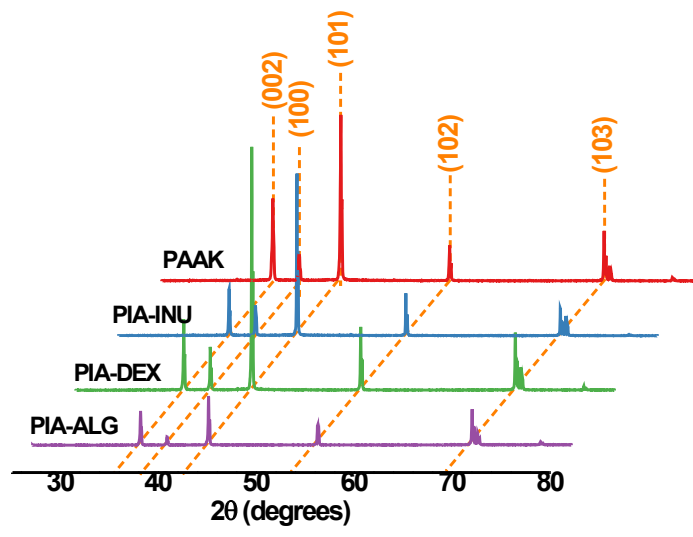

**Fig. S6.** X-ray diffraction patterns for the Zn anodes after performing the stability tests on the ZAB by demanding different current densities.

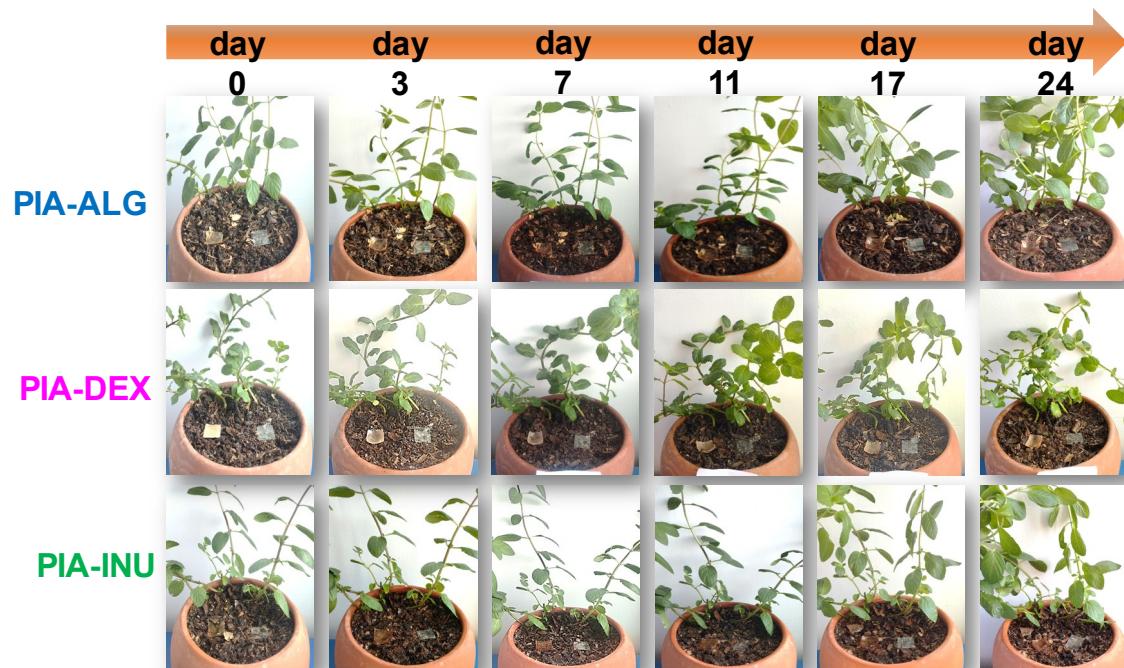

**Fig. S7.** Biodegradability photographs of biohydrogels using *Mentha piperita* pots as environmental degradation model, after 0, 3, 7, 11, 17 and 24 days.



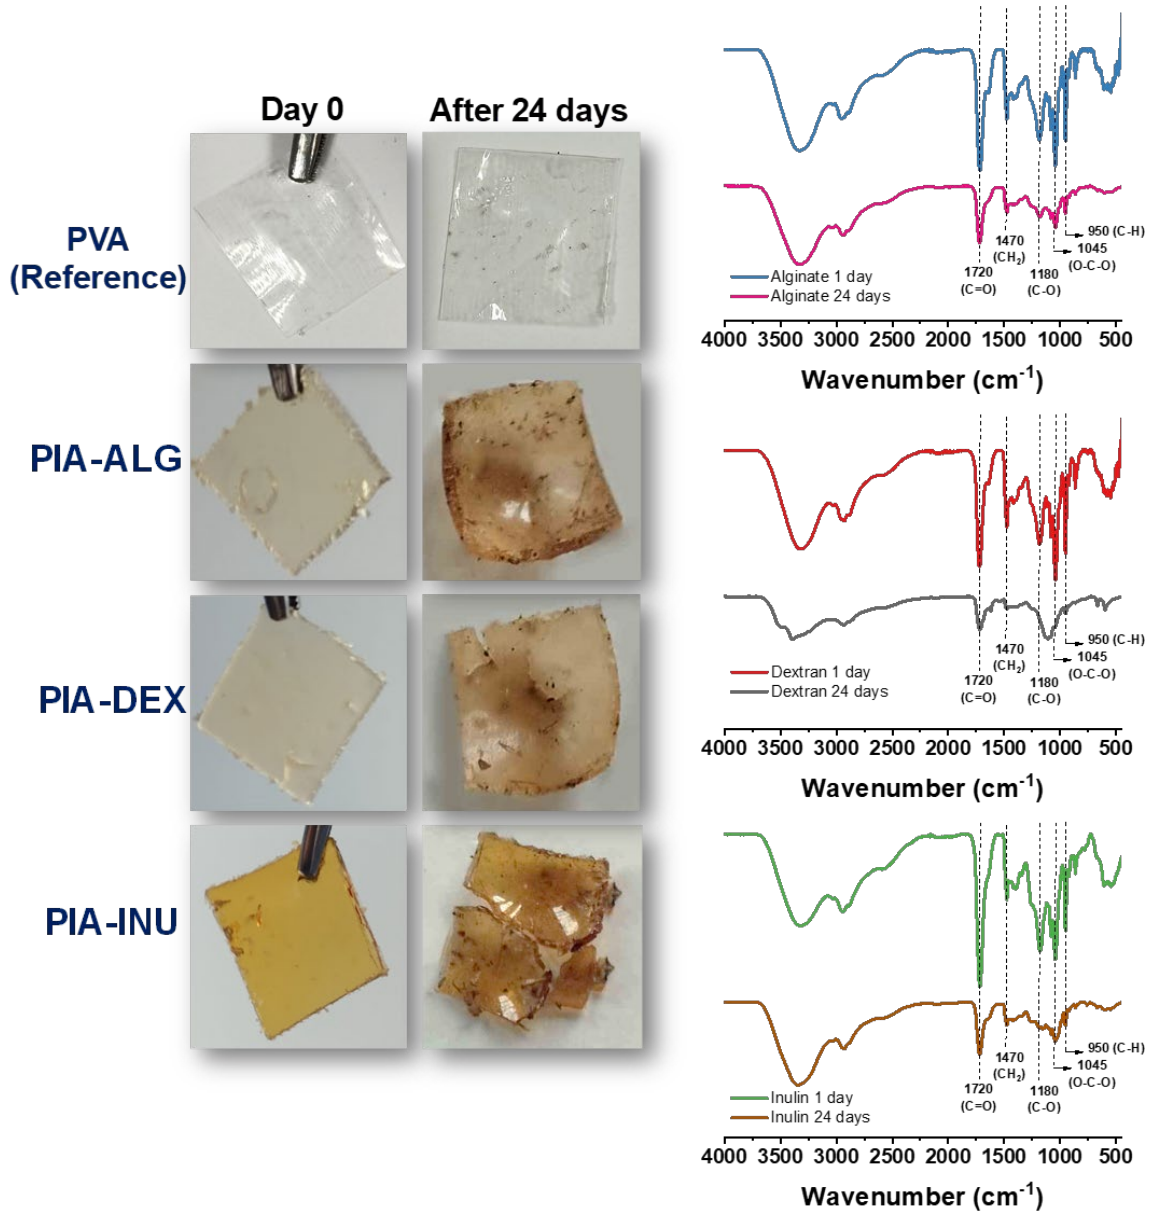

Fig. S8. a) Photographs of biohydrogels after being exposed to the soil surface after 0 and 24 days, and PVA membrane as reference. b) FTIR of the biohydrogels after exposure to the soil surface after 0 and 24 days.

**Table S1.** Summary of resistances found for the ZABs operated with the biohydrogels at 3 and 10 wt%.

| <b>Biohydrogel</b> | <b>Biohydrogel concentration</b> | <b>R1 (<math>\Omega</math>)</b> | <b>R2 (<math>\Omega</math>)</b> |
|--------------------|----------------------------------|---------------------------------|---------------------------------|
| PIA-INU            | 3 wt. %                          | 2.75                            | 3.85                            |
| PIA-DEX            | 3 wt. %                          | 3.27                            | 8.7                             |
| PIA-ALG            | 3 wt. %                          | 3.62                            | 9.09                            |
| PAAK               | 3 wt. %                          | 3.32                            | 8.80                            |
| PIA-INU            | 10 wt. %                         | 3.06                            | 22.70                           |
| PIA-DEX            | 10 wt. %                         | 3.03                            | 6.80                            |
| PIA-ALG            | 10 wt. %                         | 5.84                            | 9.56                            |
| PAAK               | 10 wt. %                         | 3.48                            | 61.82                           |

**Table S2.** Battery performance comparison with recently reported Zinc-air batteries operated with hydrogels.

| Hydrogel                                                 | Air-electrode mass loading ( $\text{mg cm}^{-2}$ )                                                    | Open-circuit potential (V) | Current density @ 0.6 V ( $\text{mA cm}^{-2}$ ) | Power density ( $\text{mW cm}^{-2}$ ) | Number of functional cycles of charge/discharge                                                                                                 | Ref.      |
|----------------------------------------------------------|-------------------------------------------------------------------------------------------------------|----------------------------|-------------------------------------------------|---------------------------------------|-------------------------------------------------------------------------------------------------------------------------------------------------|-----------|
| Polyacrylic acid (PAA) soaked in 6 M KOH                 | 0.6 (mixture of 40 % Pt, 20 % Ru, 40 % C)                                                             | Not provided               | Not provided                                    | Not provided                          | 25 cycles demanding $0.5 \text{ mA cm}^{-2}$ ; time= 10 min/cycle; total duration of the ZAB= 4.1 h                                             | 1         |
| Polyvinyl alcohol (PVA) soaked in 6 M KOH                | 0.6 (mixture of 40 % Pt, 20 % Ru, 40 % C)                                                             | Not provided               | Not provided                                    | Not provided                          | 24 cycles demanding $0.5 \text{ mA cm}^{-2}$ ; time= 10 min/cycle; total duration of the ZAB= 4 h                                               | 1         |
| Starch gel (from flour) soaked in 6 M KOH                | 2.0 (Mn-Co-Fe@carbon nanotubes)                                                                       | 1.48                       | 90 @ 0.95 V                                     | ~84                                   | Cycles were performed at $2 \text{ mA cm}^{-2}$ (2.2 % of the total current density); time= 10 min/cycle; total duration of the ZAB = 35 h      | 2         |
| PAA + 11.25 M KOH + 0.25 M ZnO                           | Not provided (Pt/C + Ir/C)                                                                            | 1.3 V                      | ~90                                             | ~50                                   | 80 cycles performed at $1 \text{ mA cm}^{-2}$ (1.1 % of the total current density); time= 20 min/cycle; total duration of the ZAB= 26.7 h       | 3         |
| Sodium polyacrylate (PANa) + cellulose soaked in 6 M KOH | Not provided (Polypyrrole-coated-graphene @ ZIF-8 to obtain Fe-embodied porous nitrogen-doped carbon) | 1.48                       | ~330                                            | ~200                                  | 220 cycles performed at $5 \text{ mA cm}^{-2}$ (1.5 % of the total current density); time= 30 min/cycle; total duration of the ZAB= 110 h       | 4         |
| Sodium polyacrylate + 0.5 g starch                       | 2 (mixture of 50 % Pt/C and 50 % $\text{RuO}_2/\text{C}$ )                                            | 1.40                       | ~100                                            | 68                                    | 132 cycles performed at $1 \text{ mA cm}^{-2}$ (1 % of the total current density); time= 20 min/cycle; total duration of the ZAB= 44 h          | 5         |
| Agar + PVA + graphene oxide in 6 M KOH                   | 1 ( $\text{ZnFe}_2\text{O}_4$ spinel on carbon microspheres)                                          | ~1.1                       | ~150                                            | 123.7                                 | 180 cycles performed at $0.5 \text{ mA cm}^{-2}$ (0.33 % of the total current density); time= 10 min/cycle; total duration of the ZAB= ~30 h    | 6         |
| Inulin + 6 M KOH                                         | 1 (Ni-Co-Mn trimetallic spinel)                                                                       | 1.44                       | 112                                             | 62                                    | 1600 cycles performed at $0.16 \text{ mA cm}^{-2}$ (0.15 % of the total current density); time= 240 s/cycle; total duration of the ZAB= 106.6 h | This work |

## References

- 1 T. N. T. Tran, H. J. Chung and D. G. Ivey, *Electrochim. Acta*, 2019, **327**, 135021.
- 2 Y. Zuo, K. Wang, M. Wei, S. Zhao, P. Zhang and P. Pei, *Cell Reports Phys. Sci.*, 2022, **3**, 100687.
- 3 H. Zhang, T. Wang, A. Sumboja, W. Zang, J. Xie, D. Gao, S. J. Pennycook, Z. Liu, C. Guan, J. Wang, H. Zhang, W. J. Zang, S. J. Pennycook, C. Guan, J. Wang, T. T. Wang, D. Q. Gao, A. Sumboja, Z. L. Liu and J. P. Xie, *Adv. Funct. Mater.*, 2018, **28**, 1804846.
- 4 L. Ma, S. Chen, D. Wang, Q. Yang, F. Mo, G. Liang, N. Li, H. Zhang, J. A. Zapien and C. Zhi, *Adv. Energy Mater.*, 2019, **9**, 1803046.
- 5 Y. Zhang, Y. Chen, M. Alfred, F. Huang, S. Liao, D. Chen, D. Li and Q. Wei, *Compos. Part B Eng.*, 2021, **224**, 109228.
- 6 Y. Yang, T. Wang, Y. Guo, P. Liu, X. Han and D. Wu, *Mater. Today Chem.*, 2023, **29**, 101384.
